# Supplementary material for: FAT1 mutations cause a glomerulotubular nephropathy
Source: PubMed Central journal article supplement (PMC4770090; doi:10.1038/ncomms10822), 2016-02-24
Supplement: ncomms10822-s1.pdf [file ncomms10822-s1.pdf]

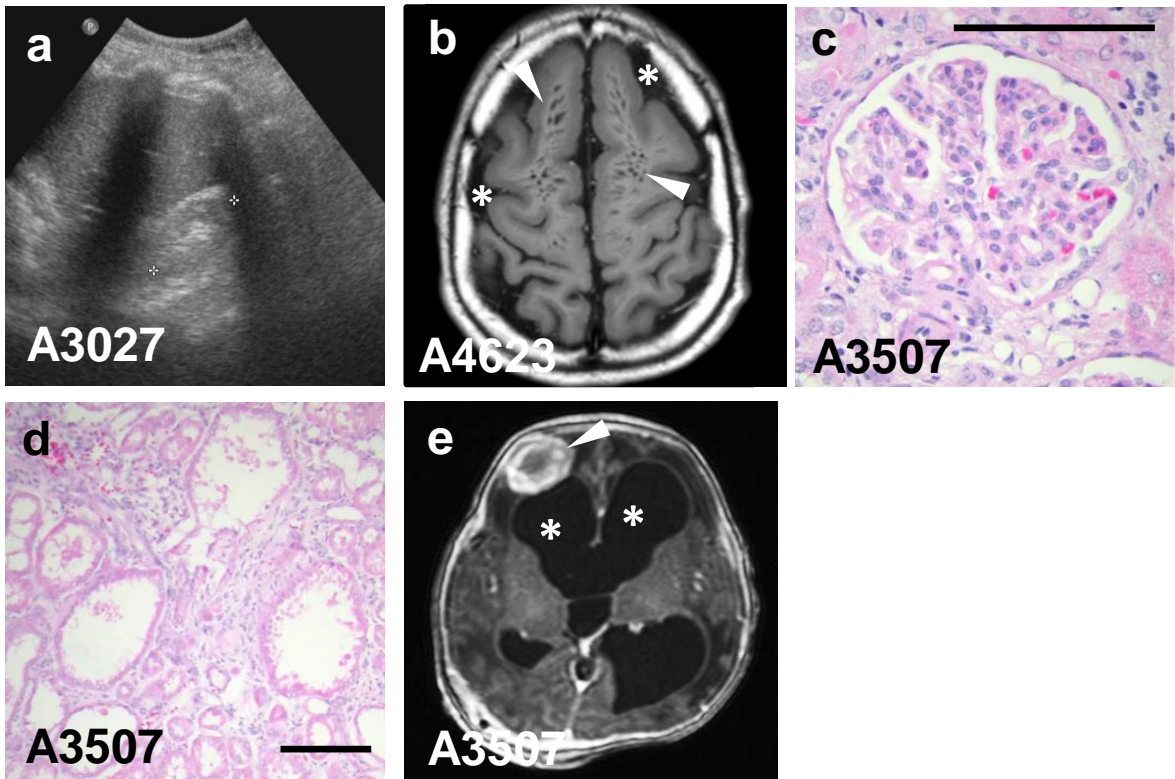

**Supplementary Figure 1. Clinical manifestations of individuals with *FAT1* mutations.**

**(a)** Renal ultrasound of right kidney in A3027 reveals small renal cysts, loss of corticomedullary differentiation, and increased echogenicity, rendering the renal pattern brighter than the liver's (L).

**(b)** Cranial MRI of A4623 depicts pachygyria with few broad coarse gyri (asterisks) and dilated Virchow-Robin spaces (arrowheads).

**(c)** Renal histology of A3507 shows diffuse mesangial sclerosis (H&E stain). Scale bar, 100  $\mu\text{m}$ .

**(d)** Renal histology of A3507 shows tubular cysts, interstitial fibrosis and infiltrations. Scale bar, 100  $\mu\text{m}$ .

**(e)** Brain MRI of A3507 after VA shunt implantation in the right ventricle shows dilation of the lateral ventricles (asterisks) and an area of hemorrhage (arrowhead).

**a** Podocyte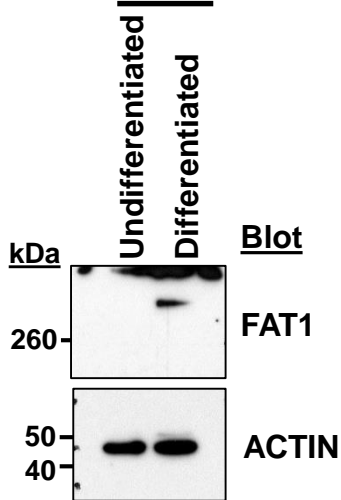**b**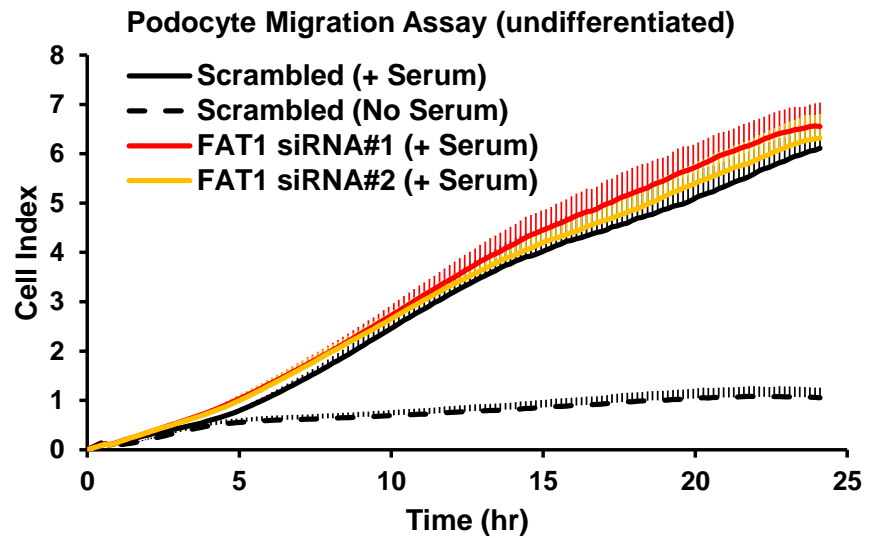**c**Podocyte  
(differentiated)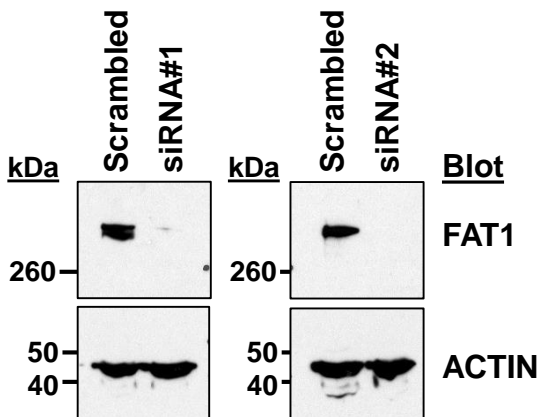**Supplementary Figure 2. *FAT1* knockdown in cultured human podocytes and in IMCD3 renal epithelial cells.**

(a) Undifferentiated cultured human podocytes do not express *FAT1* endogenously, whereas differentiated cultured podocytes express *FAT1*.

(b) *FAT1* siRNAs did not have any effect on migration in undifferentiated podocytes because undifferentiated podocytes do not express *FAT1*. Error bars are shown in one direction only for clarity and indicate SDs for 5 independent experiments.

(c) *FAT1* knockdown by siRNAs (siRNA#1 and siRNA#2) in differentiated podocytes significantly reduced *FAT1* protein.

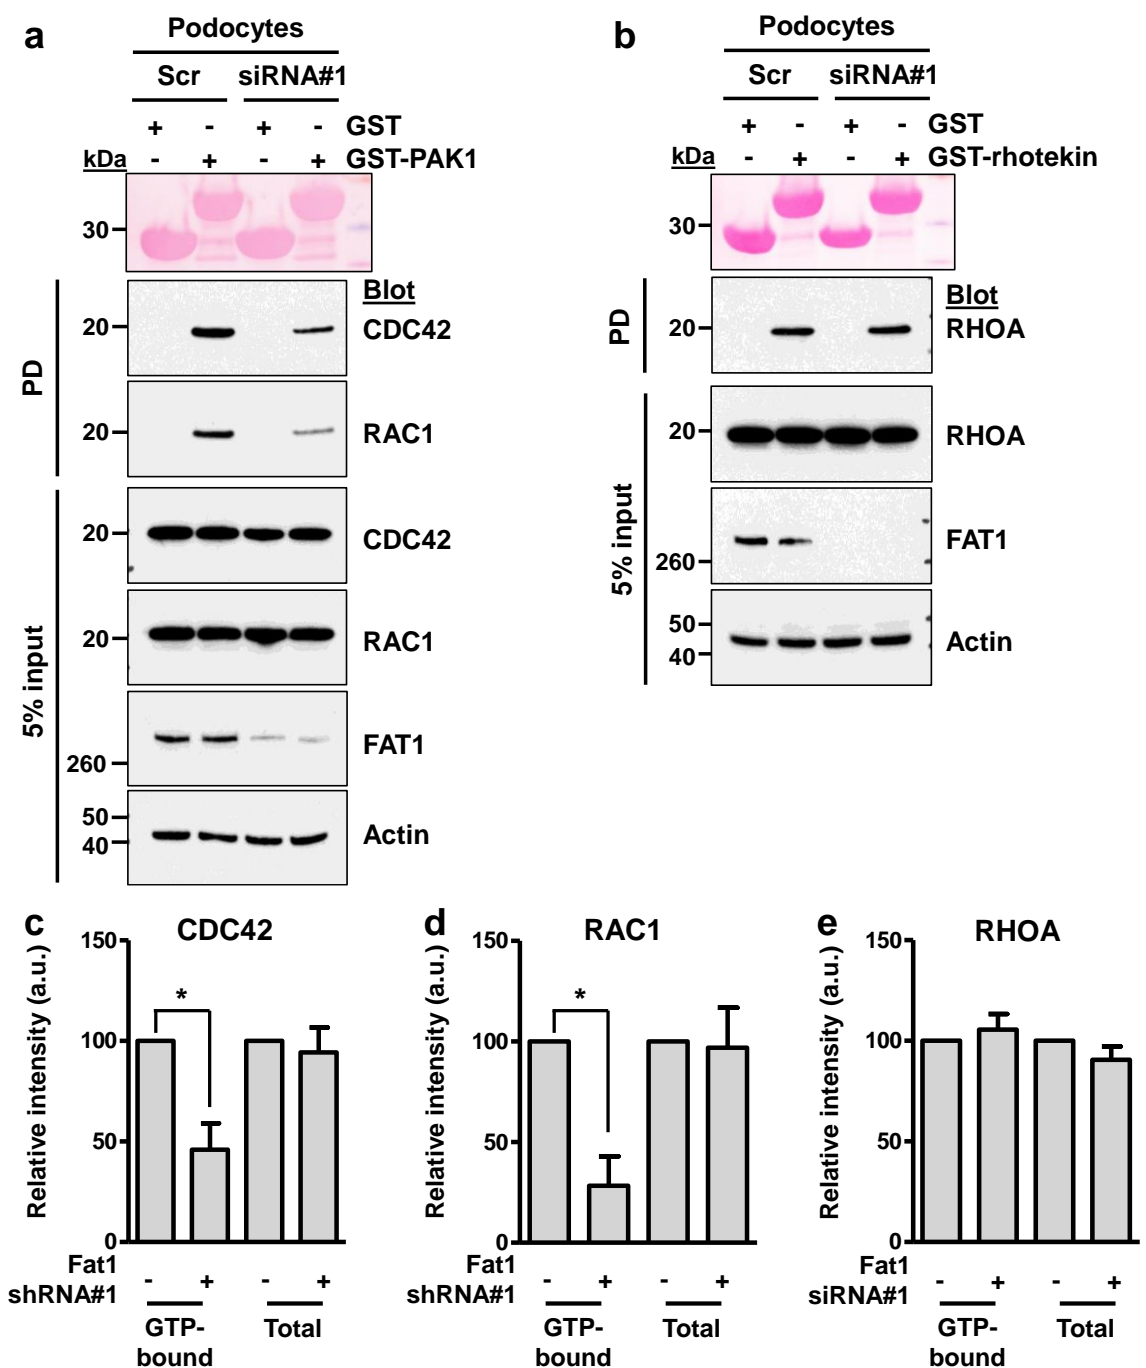

**Supplementary Figure 3. Effects of FAT1 knockdown on RHO GTPases activity in differentiated cultured human podocytes.**

**(a)** Active GTP-bound RAC1 and CDC42 precipitated from differentiated podocytes transfected with scrambled or FAT1 siRNA using a GST-PAK1 (CRIB) pull-down assays. Compared to control podocytes, podocytes transfected with FAT1 siRNA exhibited a significant decrease in relative RAC1 and CDC42 (46% and 28%, respectively). The efficiency of knockdown by siRNA was confirmed by immunoblotting with an anti-FAT1 antibody (second to lowest panel). **a** and **b** represent 3 experiments each.

**(b)** Active GTP-bound RHOA precipitated from differentiated podocytes transfected with scrambled (Scr) or FAT1 siRNA using a GST-rhotekin (RBD) pull-down assay. Cells transfected with scrambled control siRNA versus FAT siRNA exhibited no significant difference in relative RHOA activity.

**(c-e)** Quantification of CDC42 (**c**), RAC1 (**d**), and RHOA (**e**) in FAT1-depleted cells compared to control cells. Error bars indicate the standard deviation for three independent experiments. \* < 0.05, t-test.

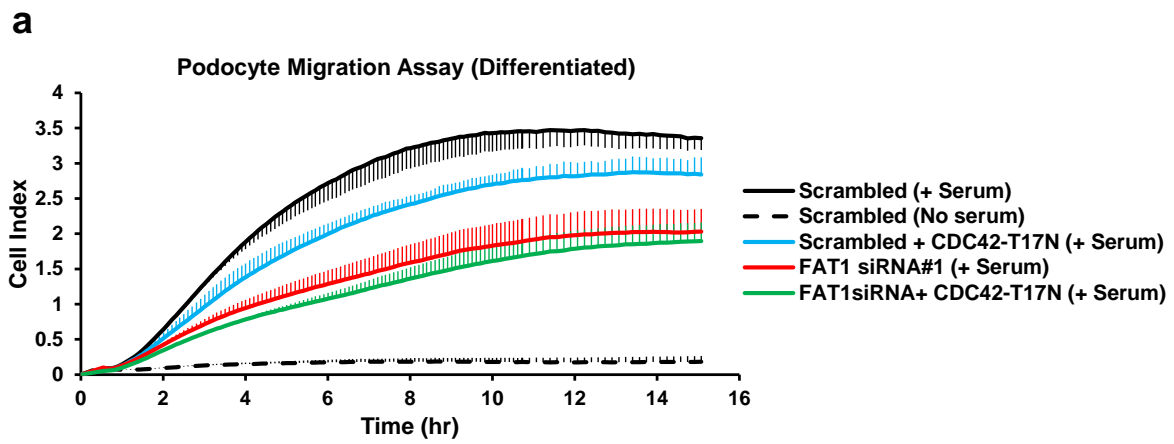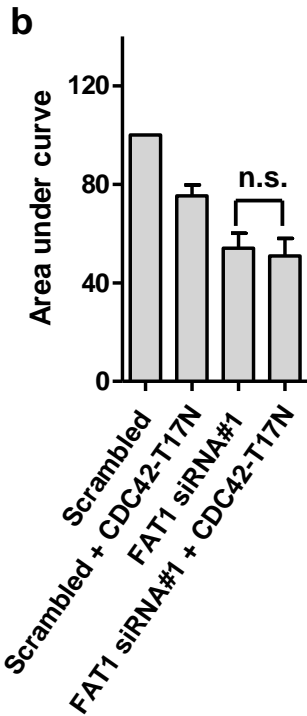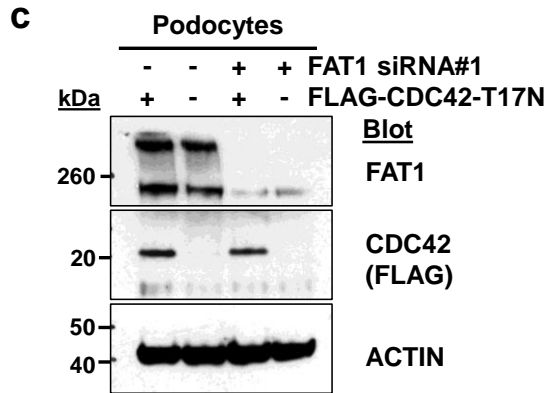

**Supplementary Figure 4. Effects of dominant negative CDC42 and FAT1 knockdown on podocyte migration.**

**(a)** To overexpress of CDC42-T17N in differentiated podocytes, pLenti-CMV-Blast-CDC42-T17N and lentiviral packaging vectors were used. Overexpression of CDC42-T17N resulted in decreased migration in differentiated podocytes (blue). However, overexpression of CDC42-T17N failed to further decrease migration in podocytes with FAT1 knockdown (red vs. green). Each cell index value corresponds to the average of more than triplicates and standard deviation is in only one direction for clarity.

**(b)** Bar graphs represent the area under curved of **(a)**, and data represent the mean + stand deviation of three independent experiments. n.s., not significant, t-test.

**(c)** Western blot to examine efficiency of FAT1 knockdown and CDC42-T17N overexpression in differentiated cultured human podocytes. **c** represent 3 experiments.



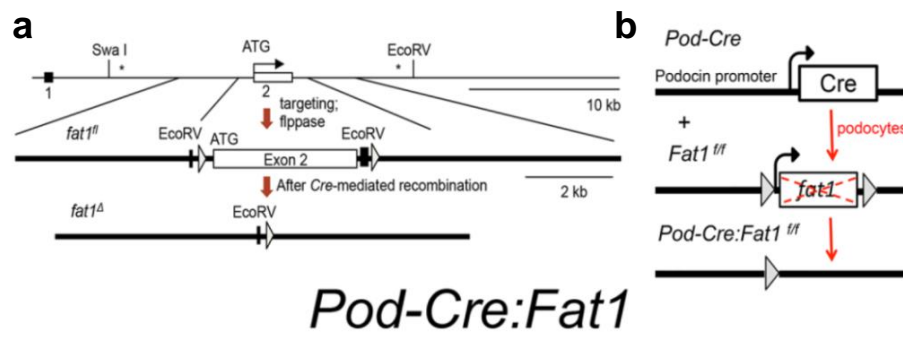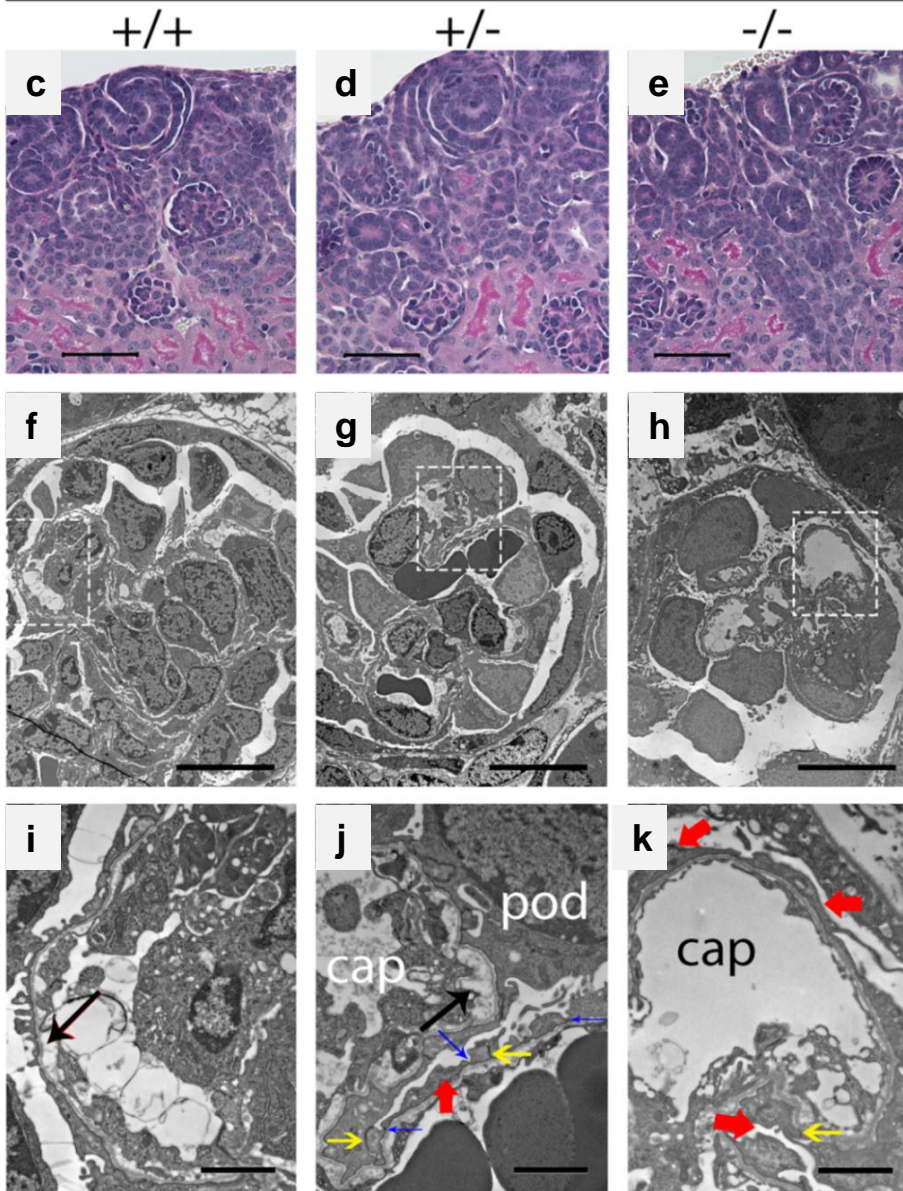

**Supplementary Figure 5. Podocyte-specific *Fat1* deletion disrupts podocyte differentiation in developing mice.**

**(a)** Conditional targeting strategy for the mouse *Fat1* locus. Asterisks indicate the locations of 5' and 3' external probes used for Southern analysis to confirm targeting. Neo selection cassette was removed by flippase-mediated recombination.

**(b)** Breeding *pod-Cre* and *Fat1<sup>ff/ff</sup>* mice results in podocyte specific *Fat1* deletion.

**(c-e)** PAS stains show normal nephron and glomerular development, and no significant difference in nephrogenic zone between wild type and *Fat1* mutants.

**(f-h)** Transmission electron micrograph of renal glomeruli from wild type and mutant mice.

**(i-k)** Inset of panels f-h.

**(f, i)** Wild type glomeruli show normal ultrastructure including split immature GBM (arrow).

**(j)** *Fat1<sup>+/-</sup>* glomeruli show foot process effacement (red arrow), tight junctions (yellow arrows) and some slit diaphragms (blue arrows).

**(k)** *Fat1<sup>-/-</sup>* glomeruli show complete foot process effacement (red arrows), normal endothelium and GBM. Scale bars = 10 μm (d-e) and 2 μm (g-i). Pod, podocyte; cap, capillary.

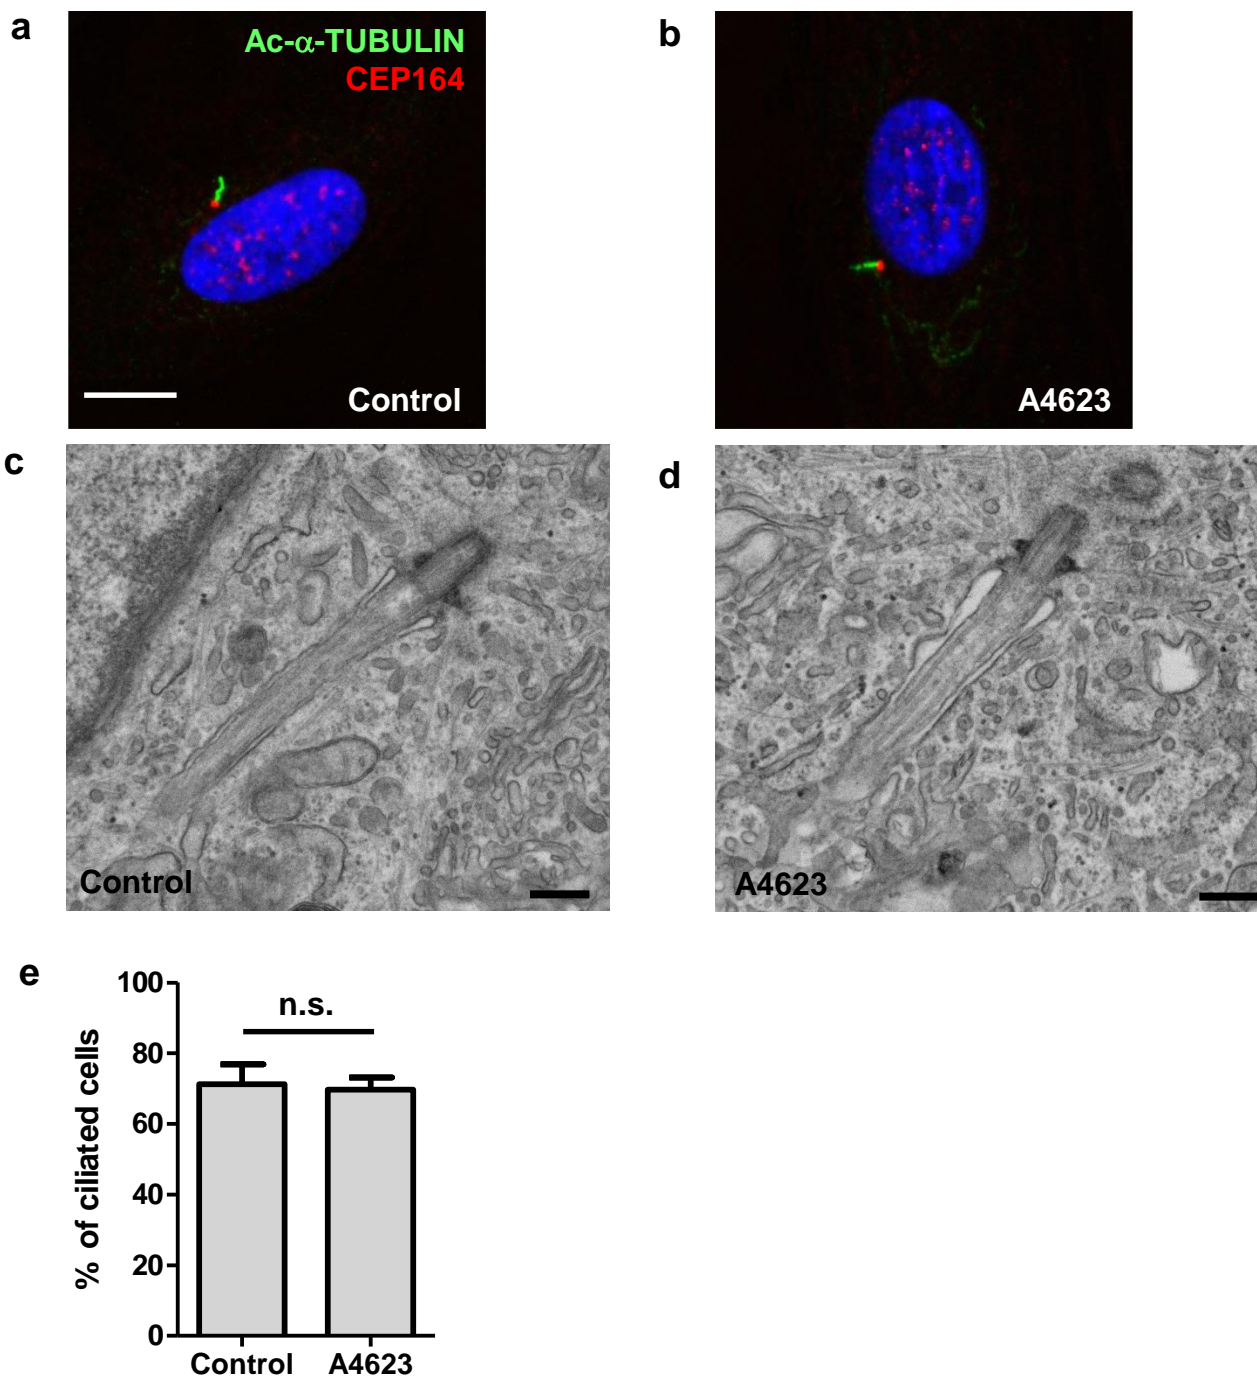

**Supplementary Figure 6. A truncating mutation in *FAT1* does not cause defects in cilia.**

**(a,b)** Fibroblasts from control and affected individuals A4623 were grown on coverslips, serum starved for 48 hr, then fixed and processed for immunofluorescence with antibodies against acetylated- $\alpha$ -tubulin and CEP164 antibodies to stain ciliary axoneme and centrosome, respectively. There was no defect in ciliation. Scale bar: 10  $\mu$ m.

**(c,d)** Transmission electron microscopy (TEM) images of fibroblasts from healthy control and A4623 who carries a homozygous c.3093\_3096del:p.P1032Cfs\*11 mutation in *FAT1*. Fibroblasts were serum-starved for 48 hours before proceeding for TEM. Note that the cilium in A4623 fibroblasts does not have any appreciable structural defect. Scale bar: 0.5  $\mu$ m.

**(e)** The ability of cells to form cilia, in cells with a unique rod like acetylated- $\alpha$ -tubulin staining was quantified from images. Graphs show the mean + standard deviation of three independent experiments, in which at least 60 cells were counted. n.s., not significant, t-test.

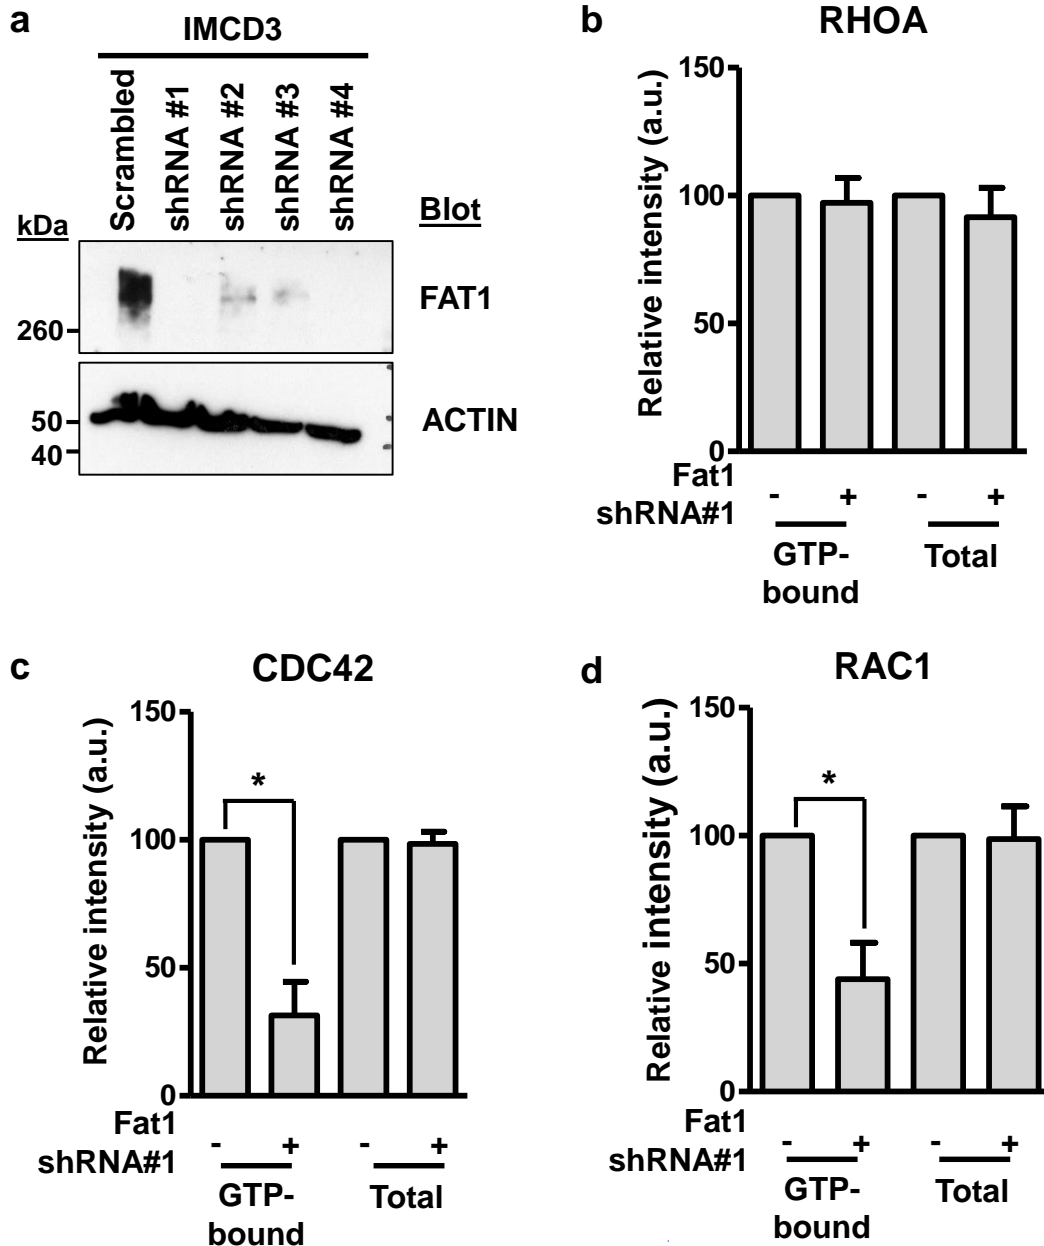

**Supplementary Figure 7. Effects of *Fat1* knockdown on RHO GTPase activity in IMCD3 cells.**

**(a)** Stable knockdown of *Fat1* in IMCD3 using lentivirus-mediated shRNAs demonstrates efficient knockdown by all four shRNAs.

**(b-c)** Quantification of RHOA **(b)**, CDC42 **(c)**, and RAC1 **(d)** in *Fat1*-depleted IMCD3 cells compared to control cells. Error bars indicate the standard deviation for three independent experiments for RHOA and four independent experiment for CDC42 and RAC1. \* < 0.05, t-test.

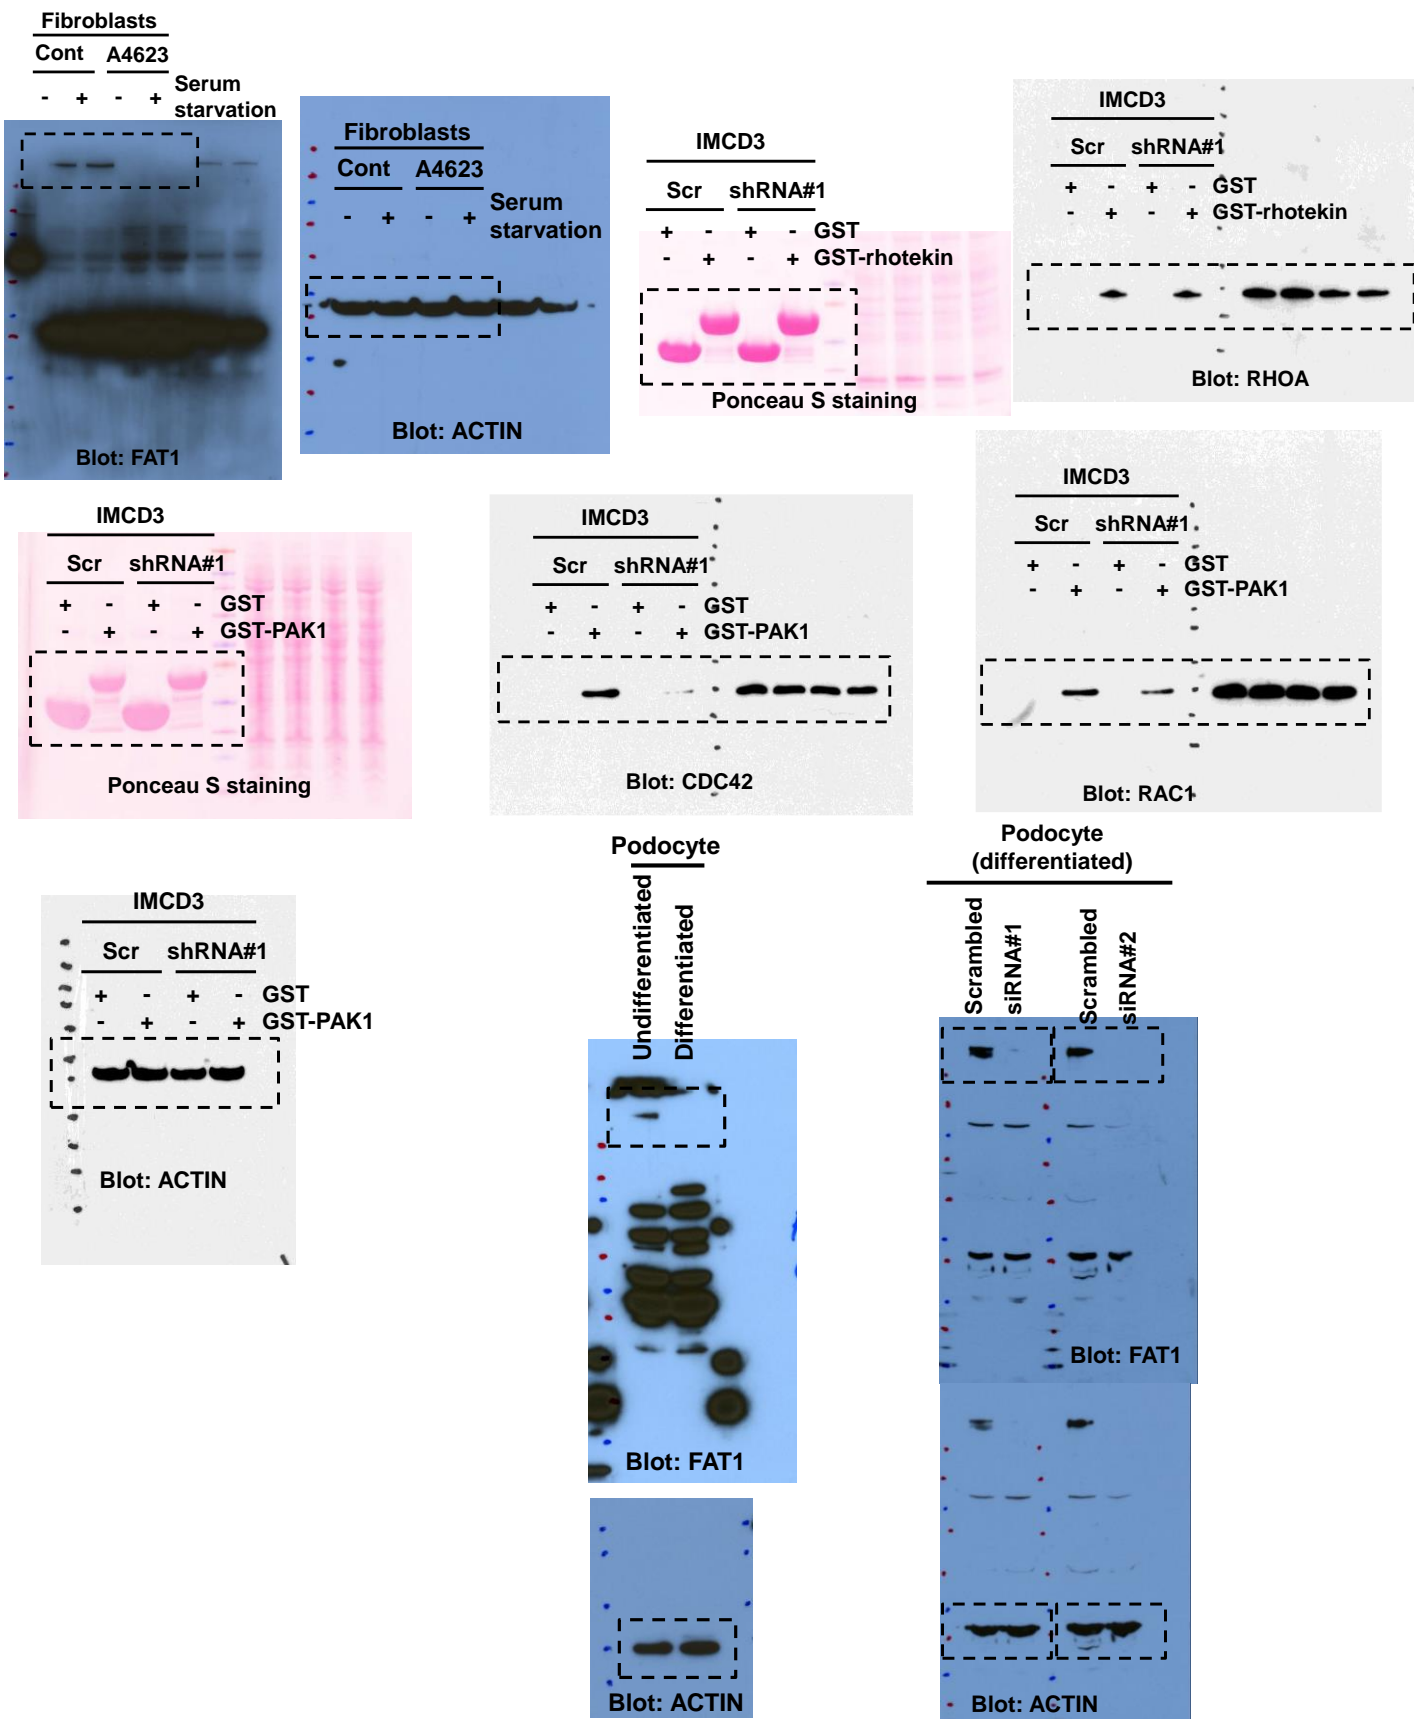

**Supplementary Figure 8a.** Full scans of Western blot data corresponding to Fig 2a, 4e, 4f, Supplementary Fig. 2a and 2c. .



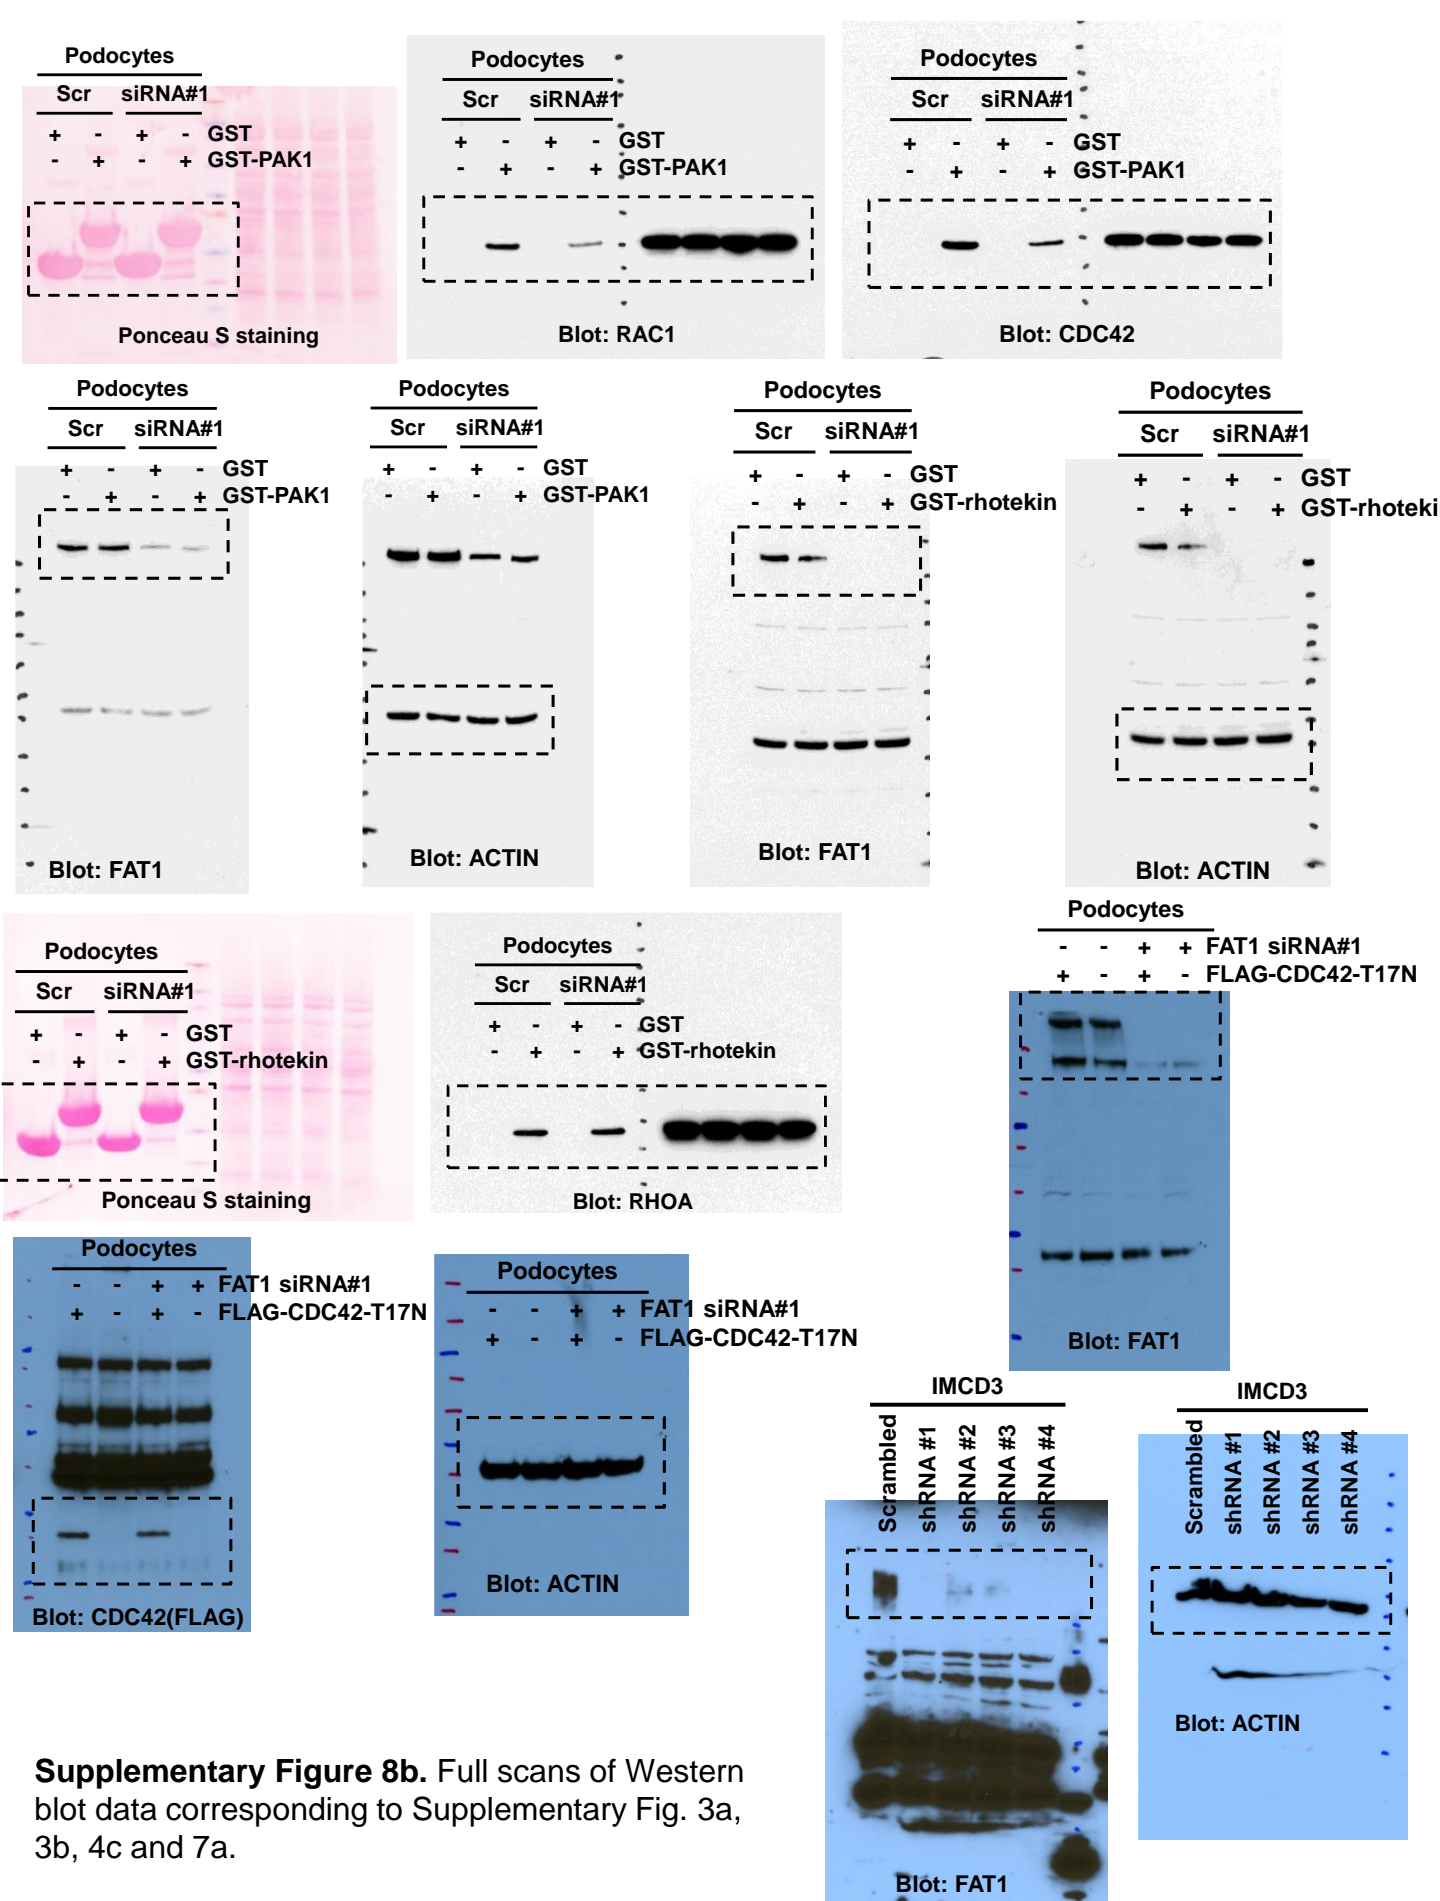

**Supplementary Figure 8b.** Full scans of Western blot data corresponding to Supplementary Fig. 3a, 3b, 4c and 7a.

**Supplementary Table 1. Filtering process for variants from normal reference sequence (VRS) following whole exome sequencing (WES) in A4623 and A3027**

| <b>FAMILY</b>                                                       | <b>A4623</b>                                                  | <b>A3027</b>                                         |
|---------------------------------------------------------------------|---------------------------------------------------------------|------------------------------------------------------|
| Consanguinity                                                       | Yes                                                           | Yes                                                  |
| <sup>a</sup> # of homozygosity peaks                                | 15                                                            | 18                                                   |
| Cumulative<br>Homozygosity by descent <sup>a</sup> [Mb]             | 151.1                                                         | 215.5                                                |
| <sup>b</sup> Hypothesis from mapping:<br>homozygous or heterozygous | <b>homozygous</b>                                             | <b>homozygous</b>                                    |
| Total sequence reads (Million)                                      | 144                                                           | 49                                                   |
| Matched Reads                                                       | 98.4%                                                         | 99.2%                                                |
| Total DIPs                                                          | 52,571                                                        | 10,779                                               |
| Exonic DIPs                                                         | 244                                                           | 262                                                  |
| % exonic / total DIPs                                               | 0.46%                                                         | 2.40%                                                |
| DIPs in homozygosity peaks                                          | 17                                                            | 22                                                   |
| DIPs which are not SNP137                                           | 17                                                            | 20                                                   |
| DIPs after inspection<br>and which are not SNP137 (>1% MAF)         | 2                                                             | 2                                                    |
| Sanger confirmation /<br>Segregation                                | 2                                                             | 0                                                    |
| Total SNPs                                                          | 430,162                                                       | 30,745                                               |
| Exonic SNPs                                                         | 5,194                                                         | 1,364                                                |
| % exonic / total SNPs                                               | 1.21%                                                         | 4.40%                                                |
| SNPs in homozygosity peaks                                          | 109                                                           | 186                                                  |
| SNPs which are not SNP137                                           | 68                                                            | 136                                                  |
| SNPs after inspection<br>and which are not SNP137 (>1% MAF)         | 12                                                            | 8                                                    |
| Sanger confirmation / Segregation                                   | 1                                                             | 2                                                    |
| Causative gene                                                      | <b><i>FAT1</i></b>                                            | <b><i>FAT1</i></b>                                   |
| Mutation effect on gene product                                     | <b>c.3093_3096del;<br/>p.Pro1032Cysfs*11<br/>(homozygous)</b> | <b>c.857A&gt;G;<br/>p.Asn286Ser<br/>(homozygous)</b> |

<sup>a</sup>see Fig. 1 for A4623.

<sup>b</sup>evaluation for homozygous variants was done in regions of homozygosity by descent for A4623.

"-" , not applicable; DIP, deletion/insertion polymorphism; SNPs, single nucleotide polymorphism

**Supplementary Table 2. Oligonucleotide sequences used in this study**

| <b>Target sequences of siRNAs<sup>#</sup></b> |                          |
|-----------------------------------------------|--------------------------|
| <i>FAT1</i> siRNA                             | GGAAGGAATTGGAATCGTT      |
| <i>FAT1</i> siRNA#2                           | CAAGATGGGTGTTTACATT      |
| <i>FAT1</i> siRNA                             | TCACATGATTGGAGTAATA      |
| <i>FAT1</i> siRNA                             | CAAGGAAGCTCGTTCACAA      |
| <b>Target sequences of shRNAs</b>             |                          |
| <i>Fat1</i> shRNA#1                           | GCCGAGGGAATAGGTATTATT    |
| <i>Fat1</i> shRNA #2                          | CCACCCAATTACTIONCAGTGAAA |
| <i>Fat1</i> shRNA #3                          | GCCACGTCATTCGCTATGTTA    |
| <i>Fat1</i> shRNA #4                          | CGCCACGATTACTCTCAATAA    |

<sup>#</sup>For *FAT1* siRNA#1, a pool of the listed four siRNAs was transfected into cultured podocytes, whereas for *FAT1* siRNA#2, a single siRNA was transfected.
